# Supplementary material for: The Role of Physical Activity in Adjunctive Nursing Management of Neuro-Degenerative Diseases among Older Adults: A Systematic Review of Interventional Studies
Source: MDPI journal article supplement (doi:10.3390/life14050597), 2024-05-07
Supplement: s1 [file s1]

SUPPLEMNATRY Table S1. The extraction table of the included studies

| Author and Year              | Study Design                                   | Sample Size                       | Type of Neurodegenerative Disease       | Type of Physical Activity Intervention                       | Duration of Intervention | Outcome Measures                                                                                                                                                                                                                                                         | Key Findings                                                                                                                                                                                                                                                                         |
|------------------------------|------------------------------------------------|-----------------------------------|-----------------------------------------|--------------------------------------------------------------|--------------------------|--------------------------------------------------------------------------------------------------------------------------------------------------------------------------------------------------------------------------------------------------------------------------|--------------------------------------------------------------------------------------------------------------------------------------------------------------------------------------------------------------------------------------------------------------------------------------|
| Rivas-Campo et al., 2023[47] | Single-Blind Randomized Controlled Trial       | 132 (64 intervention, 68 control) | Mild Cognitive Impairment (MCI)         | High-Intensity Intervallic Functional Training (HIFT)        | 3 months                 | Montreal Cognitive Assessment (MoCA), Trail Making Test (TMT) A & B, Verbal Fluency Animal Test (VFAT), Digit Symbol Substitution Test (DSST), D2 Test                                                                                                                   | The intervention group showed significant improvements in cognitive functions, attention, and verbal fluency compared to the control group. No significant results for selective attention or processing speed.                                                                      |
| Baker et al., 2010 [48]      | Six-month randomized controlled clinical trial | 33 (17 women, 16 men)             | Amnesic Mild Cognitive Impairment (MCI) | High-intensity aerobic exercise vs. stretching control group | 6 months                 | Performance on Symbol-Digit Modalities, Verbal Fluency, Stroop, Trails B, Task Switching, Story Recall, and List Learning. Fasting plasma levels of insulin, cortisol, brain-derived neurotrophic factor, insulin-like growth factor-I, and $\beta$ -amyloids 40 and 42. | Aerobic exercise improved cognitive function, especially in executive control processes, and had sex-specific effects on glucose metabolism and hypothalamic-pituitary-adrenal axis and trophic activity. Improvements were more pronounced for women in terms of executive function |

|                              |                                            |     |                                   |                                                   |          |                                                                                                   |                                                                                                                                                                                                                                                                                                                                                                                                                                                                                                  |
|------------------------------|--------------------------------------------|-----|-----------------------------------|---------------------------------------------------|----------|---------------------------------------------------------------------------------------------------|--------------------------------------------------------------------------------------------------------------------------------------------------------------------------------------------------------------------------------------------------------------------------------------------------------------------------------------------------------------------------------------------------------------------------------------------------------------------------------------------------|
|                              |                                            |     |                                   |                                                   |          |                                                                                                   | and metabolic responses.                                                                                                                                                                                                                                                                                                                                                                                                                                                                         |
|                              |                                            |     |                                   |                                                   |          |                                                                                                   | Significant improvements in gait stability, balance, and independence in activities of daily living in the intervention group compared to the control group. No significant changes in frailty classification. The high-intensity group showed significant improvements in Trail Making Test B, indicating enhancements in processing speed and divided attention, compared to the low-intensity group. However, the improvements in cognitive functions were not conclusively attributed to the |
| Rivas-Campo et al., 2023[58] | Blind Randomized Controlled Clinical Trial | 169 | Mild Cognitive Impairment (MCI)   | High-Intensity Functional Training (HIFT)         | 12 weeks | Gait stability, balance, independence in activities of daily living, functional capacity, frailty |                                                                                                                                                                                                                                                                                                                                                                                                                                                                                                  |
| Pallesen et al., 2019[59]    | Pilot Randomised Controlled Trial          | 30  | Post-stroke Cognitive Impairments | High-Intensity vs. Low-Intensity Aerobic Exercise | 4 weeks  | Trail Making Test B, neuropsychological tests assessing various cognitive functions               |                                                                                                                                                                                                                                                                                                                                                                                                                                                                                                  |

|                                         |                                                          |                           |        |                              |                                                  |                        |                                                                                                                                |                                                                                                                                                                                                                                                                                                                                                                                                                                                                                |
|-----------------------------------------|----------------------------------------------------------|---------------------------|--------|------------------------------|--------------------------------------------------|------------------------|--------------------------------------------------------------------------------------------------------------------------------|--------------------------------------------------------------------------------------------------------------------------------------------------------------------------------------------------------------------------------------------------------------------------------------------------------------------------------------------------------------------------------------------------------------------------------------------------------------------------------|
| Vieira de Moraes Filho et al., 2020[60] | Randomized Controlled Trial                              | 40 intervention, control) | (25 15 | Parkinson's Disease (PD)     | Progressive Resistance Training (PRT)            | 9 weeks                | Bradykinesia UPDRS subscale, knee extensors isokinetic strength, Ten Meters Walk Test, Timed Up&Go Test, 30-Second Chair Stand | intervention due to potential ceiling effects and baseline inequalities. PRT significantly reduced bradykinesia and improved functional performance in PD patients without significant changes in muscle strength, suggesting neural enhancements. Neurofunctional training showed significant improvements in all gait parameters and quality of life compared to resistance training, emphasizing the superiority of neurofunctional approaches for this patient population. |
| Smaili et al., 2018[61]                 | Randomized Clinical Trial                                | 40                        |        | Parkinson's Disease          | Neurofunctional Training vs. Resistance Training | 12 weeks (24 sessions) | Gait parameters (stride length, step length, number of steps, gait speed, cadence), Quality of Life (PDQL, PDQ-39)             | The study aimed to assess the impact of a structured 6-month aerobic exercise program on cerebrovascular                                                                                                                                                                                                                                                                                                                                                                       |
| Tyndall et al., 2013[62]                | Combined Quasi-Experimental and Prospective Cohort Study | 250                       |        | General Aging (Older Adults) | Aerobic Exercise                                 | 6 Months               | Cerebrovascular Function, Cognitive Function, Cardiovascular Fitness, Mood and Sleep Assessments                               |                                                                                                                                                                                                                                                                                                                                                                                                                                                                                |

|                            |                             |     |                                                      |                                                    |                                           |                                                                                                                                         |                                                                                                                                                                                                                                                                                                                                                           |
|----------------------------|-----------------------------|-----|------------------------------------------------------|----------------------------------------------------|-------------------------------------------|-----------------------------------------------------------------------------------------------------------------------------------------|-----------------------------------------------------------------------------------------------------------------------------------------------------------------------------------------------------------------------------------------------------------------------------------------------------------------------------------------------------------|
| Sungkarat et al., 2016[63] | Randomized Controlled Trial | 66  | Amnesic Mild Cognitive Impairment (a-MCI)            | Tai Chi (combined center- and home-based training) | 3 weeks center-based, 12 weeks home-based | Cognitive tests (Logical Memory, Block Design, Digit Span, Trail-Making Test B-A), Physiological Profile Assessment (PPA) for fall risk | function and cognitive abilities in older individuals, and to determine the extent of any changes post-intervention. Tai Chi significantly improved cognitive function (memory, visuospatial ability, executive function) and reduced physiological fall risk compared to control group, demonstrating its potential benefit for older adults with a-MCI. |
| Chen et al., 2023[64]      | Randomized Clinical Trial   | 328 | Mild Cognitive Impairment (MCI) with Type 2 Diabetes | Tai Chi Chuan vs. Fitness Walking                  | 24 weeks                                  | Montreal Assessment (MoCA), other cognitive subdomain measures, and blood metabolic indices                                             | Tai Chi Chuan showed significantly more benefit on global cognitive function at 36 weeks compared with fitness walking, with no significant difference at 24 weeks.                                                                                                                                                                                       |

|                               |                                   |                                                             |                                 |                                                                             |          |                                                                                                                                                              |                                                                                                                                                                                                                                                                                                                                                                                                                                                                                                         |
|-------------------------------|-----------------------------------|-------------------------------------------------------------|---------------------------------|-----------------------------------------------------------------------------|----------|--------------------------------------------------------------------------------------------------------------------------------------------------------------|---------------------------------------------------------------------------------------------------------------------------------------------------------------------------------------------------------------------------------------------------------------------------------------------------------------------------------------------------------------------------------------------------------------------------------------------------------------------------------------------------------|
| Liu et al., 2022[65]          | Randomized Control Trial          | 50                                                          | Mild Cognitive Impairment (MCI) | Exergaming-Based Tai Chi (EXER-TC) vs. Traditional Tai Chi (TC) vs. Control | 12 weeks | Montreal Cognitive Assessment (MoCA), Trail Making Test (TMT) Parts A and B, Stroop Color and Word Test (SCWT), Gait Speed, Dual-Task Cost (DTC)             | Both EXER-TC and TC groups showed improvements in cognitive function tests and dual-task gait performance compared to the control group, with no significant differences between EXER-TC and TC groups. The dance program was feasible and well-received, showing improvements in functional mobility, symptoms of depression, and bodily discomfort without adverse effects. The study supports dance's potential for physical, emotional, mental, and social health benefits in Parkinson's patients. |
| Carapellotti et al., 2022[49] | Pilot and Feasibility Study       | 10                                                          | Parkinson's Disease             | Dance (Dance for PD® model)                                                 | 12 weeks | MDS-UPDRS III, TUG, DT-TUG, Sensory Organization Test, MoCA, Trail Making Tests A&B, Digit Symbol Substitution Test, Digit Span, PDQ-39, FOG-Q, PHQ-9, FES-I | The study demonstrated the feasibility of delivering an online                                                                                                                                                                                                                                                                                                                                                                                                                                          |
| Morris et al., 2023[50]       | Clinical Trial Process Evaluation | 12 PD participants, 4 dance instructors, 2 physiotherapists | Parkinson's Disease             | Online Dance Program (ParkinDANCE Online)                                   | 4 weeks  | Not specified in the visible content                                                                                                                         | The study demonstrated the feasibility of delivering an online                                                                                                                                                                                                                                                                                                                                                                                                                                          |

|                               |                             |    |               |                                                           |          |                                                                                                       |                                                                                                                                                                                                                                                                                                                                                                                                                                                                                           |
|-------------------------------|-----------------------------|----|---------------|-----------------------------------------------------------|----------|-------------------------------------------------------------------------------------------------------|-------------------------------------------------------------------------------------------------------------------------------------------------------------------------------------------------------------------------------------------------------------------------------------------------------------------------------------------------------------------------------------------------------------------------------------------------------------------------------------------|
| Koo, Jang, and Kwon, 2021[51] | Randomized Controlled Trial | 24 | Mild Dementia | Dual-Task Training (DTT) vs. Single-Task Training (STT)   | 8 weeks  | Stride length, stride velocity, cadence, step length, swing phase, stance phase, double support phase | dance program to individuals with early PD, highlighting engagement and practicality without reported adverse events. DTT led to significant improvements in gait parameters compared to STT, suggesting its effectiveness in improving gait function in elderly patients with mild dementia. Aerobic physical exercise showed more significant improvements in cognitive attention scores and decreased cognitive impairment and perception of exertion compared to the dual-task group. |
| Maeneja et al., 2023[52]      | Randomized Clinical Trial   | 34 | Stroke        | Aerobic Exercise Task Walking vs. Physical Dual-Cognitive | 12 weeks | Mini-Mental State Examination (MMSE), d2 Test of Attention                                            |                                                                                                                                                                                                                                                                                                                                                                                                                                                                                           |

|                      |                                     |                   |                                          |                                                                             |          |                                     |                |                                                                                                                                                                                                                                                                                                                                                                                                                                                                                                                                              |
|----------------------|-------------------------------------|-------------------|------------------------------------------|-----------------------------------------------------------------------------|----------|-------------------------------------|----------------|----------------------------------------------------------------------------------------------------------------------------------------------------------------------------------------------------------------------------------------------------------------------------------------------------------------------------------------------------------------------------------------------------------------------------------------------------------------------------------------------------------------------------------------------|
| Kim et al., 2016[53] | 6-Month Randomized Controlled Trial | 33                | Alzheimer's Disease (moderate to severe) | Physical Exercise with Multicomponent Cognitive Program (MCP) vs. MCP alone | 6 months | ADAS-cog, CDT, performance measures | MMSE, physical | The intervention group showed no significant cognitive improvement over the control group in primary analysis. However, secondary analyses adjusted for baseline values, age, sex, and education showed significant improvements in ADAS-cog scores. Physical performance improved significantly in the intervention group. Multi-component exercise training significantly improved both physical and cognitive functions in elderly participants with MCI, demonstrating its effectiveness as a non-drug intervention for this population. |
| Li et al., 2021[54]  | Randomized Controlled Trial         | 90 (84 completed) | Mild Cognitive Impairment (MCI)          | Multi-component exercise training                                           | 6 months | CM-PPT, MoCA                        | MMSE,          |                                                                                                                                                                                                                                                                                                                                                                                                                                                                                                                                              |

|                             |                                        |                                          |                                          |                                                            |          |                                                                                   |                                                                                                                                                                                                                                                                                                                                                                                                                                                                                                                                |
|-----------------------------|----------------------------------------|------------------------------------------|------------------------------------------|------------------------------------------------------------|----------|-----------------------------------------------------------------------------------|--------------------------------------------------------------------------------------------------------------------------------------------------------------------------------------------------------------------------------------------------------------------------------------------------------------------------------------------------------------------------------------------------------------------------------------------------------------------------------------------------------------------------------|
| Chow et al., 2022[55]       | Cluster Randomized Controlled Trial    | 285                                      | General Aging (Older Adults)             | Various combinations of cognitive and/or physical training | 4 months | Cognitive and physical fitness measures                                           | The study aims to determine the effects of different combinations of cognitive and physical training on cognition and physical fitness of older adults, comparing the efficacy of various training modes. Both the experimental (Wii-based training) and control groups (balance exercise therapy) improved in UPDRS-II scores, with no significant difference between groups, indicating Wii-based training and conventional balance exercises similarly improved activities of daily living in Parkinson's disease patients. |
| Pompeu et al., 2012[56]     | Single-Blind Randomized Clinical Trial | 32                                       | Parkinson's Disease                      | Nintendo Wii-based Motor and Cognitive Training            | 7 weeks  | UPDRS-II, balance, cognitive performance                                          |                                                                                                                                                                                                                                                                                                                                                                                                                                                                                                                                |
| Hariprasad et al., 2013[57] | Randomized Controlled Study            | 120 (62 yoga group, 58 waitlist control) | General Cognitive Decline in the Elderly | Yoga-Based Intervention                                    | 6 months | RAVLT, CFT, WMS-digit and spatial span, COWA test, Stroop Color Word Interference | The yoga group showed significant improvements in immediate and                                                                                                                                                                                                                                                                                                                                                                                                                                                                |



|                                    |                                                                                                                                                                                                                                                                               |
|------------------------------------|-------------------------------------------------------------------------------------------------------------------------------------------------------------------------------------------------------------------------------------------------------------------------------|
| Test, Trail Making Test<br>A and B | delayed recall of<br>verbal and visual<br>memory, attention<br>and working memory<br>(WMS-spatial span),<br>verbal fluency<br>(COWA), executive<br>function (Stroop<br>interference), and<br>processing speed<br>(Trail Making Test-<br>A) compared to the<br>waitlist group. |
|------------------------------------|-------------------------------------------------------------------------------------------------------------------------------------------------------------------------------------------------------------------------------------------------------------------------------|

---
